# Supplementary material for: Prevalence, resistance pattern, and molecular characterization of Staphylococcus aureus isolates from healthy animals and sick populations in Henan Province, China
Source: Springer Nature journal article supplement (doi:10.1186/s13099-018-0254-9), 2018-07-17
Supplement: MOESM1 [file 15959636]

**Table S1.** Characteristics of the 143 *S. aureus* isolates

| Strain | Source   | Serotype | Resistance pattern | Resistance gene and integron                           | Virulence gene                                      | PFGE | spa   | SCCmec |
|--------|----------|----------|--------------------|--------------------------------------------------------|-----------------------------------------------------|------|-------|--------|
| NJ1    | raw milk | cap8     | 八                  | gyrA-gyrB-grlA-grlB-tetM-ermC-rpoB                     | set-hla-hlb-hld-lukED-can-ebp-clfA-clfB             | P20  | t127  |        |
| NJ2    | raw milk | cap5     | 八                  | gyrA-gyrB-grlA-grlB-tetM-ermC-rpoB                     | hla-hlb-hld-lukED-ebp-clfA-clfB                     | P31  | t458  |        |
| NJ3    | raw milk | *        | 九                  | -                                                      | -                                                   | P35  | -     |        |
| NJ4    | raw milk | cap8     | 十                  | gyrA-gyrB-grlA-grlB-tetM-ermC-rpoB-class I             | hla-hlb-hld-lukED-can-ebp-clfA-clfB                 | P20  | t3626 |        |
| NJ5    | raw milk | *        | 十一                 | oqxA-oqxB-gyrA-qnrS                                    | set                                                 | -    | -     |        |
| NJ6    | raw milk | cap5     | 九                  | gyrA-gyrB-grlA-grlB-qnrB-tetM-ermC-rpoB                | set-hla-hlb-hld-lukED-ebp-clfA-clfB                 | P31  | t605  |        |
| NJ7    | raw milk | cap8     | 十                  | gyrA-gyrB-grlB                                         | set-hla-hlb-hld-lukED-can-ebp-clfA-clfB             | P20  | t127  |        |
| NJ8    | raw milk | cap5     | 八                  | gyrA-gyrB-grlA-grlB-aphA-tetM-ermC-rpoB                | set-hla-hlb-hld-lukED-ebp-clfA-clfB                 | P31  | t458  |        |
| NJ9    | raw milk | cap5     | 十                  | gyrA-gyrB-grlA-grlB-aphA-tetK-tetM-ermC-rpoB           | hla-hlb-hld-lukED-ebp-clfA-clfB                     | P31  | t267  |        |
| NJ10   | raw milk | cap8     | 八                  | gyrA-gyrB-grlA-grlB-aphA-tetM-ermC-rpoB                | set-hla-hlb-hld-lukED-can-ebp-clfA-clfB             | P20  | t127  |        |
| NJ11   | raw milk | cap8     | 九                  | gyrA-gyrB-grlA-grlB-aphA-tetM-ermC-rpoB-Tn 552         | Set-hla-hlb-hld-lukED-can-ebp-clfA-clfB             | P20  | t127  |        |
| NJ12   | raw milk | *        | 六                  | acc(6')-aph(2'')-aphA-tetM-ermB-lnu(B)                 | -                                                   | P6   | -     |        |
| NJ13   | raw milk | cap8     | 八                  | gyrA-gyrB-grlA-grlB-ermC-rpoB                          | set-hla-hlb-hld-lukED-can-ebp-clfA-clfB             | P20  | t127  |        |
| NJ14   | raw milk | cap5     | 九                  | gyrA-gyrB-grlA-grlB-tetM-ermC-rpoB                     | hla-hlb-hld-lukED-ebp-clfA-clfB                     | P31  | t458  |        |
| NJ15   | raw milk | cap5     | 五                  | -                                                      | -                                                   | P20  | t693  |        |
| NJ16   | raw milk | cap5     | 十                  | gyrA-gyrB-grlA-grlB-aphA-tetK-tetM-ermB-ermC-rpoB      | set-hla-hlb-hld-lukED-ebp-clfA-clfB                 | P29  | t267  |        |
| NJ17   | raw milk | cap8     | 六                  | gyrA-gyrB-grlA-grlB-acc(6')-aph(2'')-ermC              | set-hla-hlb-hld-lukED-can-ebp-clfB                  | P20  | t189  |        |
| NJ18   | raw milk | cap8     | 七                  | gyrA-gyrB-grlA-grlB-ermC-rpoB                          | set-hla-hlb-hld-lukED-can-ebp-clfA-clfB             | P20  | t127  |        |
| NJ19   | raw milk | cap8     | 七                  | ermC                                                   | hla-hlb-hld-lukED                                   | P20  | t127  |        |
| NJ20   | raw milk | *        | 四                  | qnrB-acc(6')-aph(2'')-aphA-tetM-ermB-lnu(B)            | lukED                                               | P6   | -     |        |
| NJ21   | Raw milk | *        | 八                  | oqxA-oqxB-acc(6')-aph(2'')-aphA-tetM-ermB-ermC-class I | -                                                   | P5   | -     |        |
| NJ22   | raw milk | cap5     | 八                  | gyrA-gyrB-grlA-grlB-ermC-rpoB                          | set-hla-hlb-hld-ebp-clfA-clfB                       | P31  | t458  |        |
| NJ23   | raw milk | cap5     | 七                  | gyrA-grlB-ermC                                         | seb-set-hla-hlb-hld-lukED-pvl-can-ebp-clfA-clfB     | P6   | t458  |        |
| NJ24   | raw milk | cap8     | 八                  | gyrA-gyrB-grlA-grlB-ermC-rpoB                          | set-hla-hlb-hld-lukED-can-ebp-clfA-clfB             | P20  | t127  |        |
| NJ25   | raw milk | cap8     | 六                  | gyrA-gyrB-grlA-grlB-ermC-rpoB                          | set-hla-hlb-hld-lukED-can-ebp-clfA-clfB             | P20  | t865  |        |
| NJ26   | raw milk | cap8     | 八                  | gyrA-gyrB-grlA-grlB-ermC-rpoB-Tn 552                   | sea-set-hla-hlb-hld-hlg-lukED-pvl-can-ebp-clfA-clfB | P20  | t3380 |        |
| NJ27   | raw milk | *        | 八                  | acc(6')-aph(2'')                                       | -                                                   | P31  | -     |        |
| NJ28   | raw milk | cap5     | 七                  | gyrA-gyrB-grlA-grlB-aphA-tetM-ermB-ermC-rpoB           | set-hla-hlb-hld-lukED-ebp-clfA-clfB                 | P6   | t458  |        |
| NJ29   | raw milk | cap8     | 七                  | gyrA-gyrB-grlA-grlB-ermC-rpoB                          | set-hla-hlb-hld-lukED-can-ebp-clfA-clfB             | P20  | t127  |        |
| NJ30   | raw milk | cap8     | 六                  | gyrA-gyrB-grlA-grlB-aphA-tetM-ermB-ermC-rpoB           | set-hla-hlb-hld-lukED-can-ebp-clfA-clfB             | P20  | t6811 |        |
| NZ1    | raw milk | cap8     | 三                  | gyrA-gyrB-grlA-grlB-ermC-rpoB-lnu(A)                   | hla-hlb-hld-lukED-can-ebp-clfA-clfB                 | P25  | t189  |        |
| NZ2    | raw milk | cap5     | 八                  | oqxA-gyrA-gyrB-grlA-grlB-rpoB-class II                 | sec-sed-sej-tsst-hla-hlb-hld-lukED-ebp-clfB         | P30  | t730  |        |
| NZ3    | raw milk | cap8     | 六                  | tetM                                                   | hla-hlb-hld-lukED-can-ebp-clfA-clfB                 | P25  | t164  |        |
| NZ4    | raw milk | cap5     | 五                  | -                                                      | -                                                   | P44  | -     |        |
| NZ5    | raw milk | cap8     | 十                  | gyrA-gyrB-ermB                                         | hld-cna                                             | P7   | t189  |        |
| NZ6    | raw milk | *        | 七                  | gyrA-aphA-tetM                                         | -                                                   | P35  | -     |        |
| NZ7    | raw milk | cap8     | 八                  | gyrA-tetM-ermC-class I-Tn 5801                         | hla-hlb-hld-clfA                                    | P24  | t6367 |        |
| NZ8    | raw milk | cap5     | 八                  | gyrA-aphA-tetM-class II                                | -                                                   | P35  | -     |        |

|      |          |      |    |                                                                           |                                                     |     |       |   |
|------|----------|------|----|---------------------------------------------------------------------------|-----------------------------------------------------|-----|-------|---|
| NZ9  | raw milk | cap8 | 七  | gyrA-gyrB-grlA-grlB-aphA-tetM-ermB-rpoB-Tn 5801                           | hla-hlb-hld-lukED-cna-ebp-clfA-clfB                 | P19 | t164  |   |
| NZ10 | raw milk | cap8 | 七  | gyrA-gyrB-grlA-grlB-aphA-tetM-ermB-ermC-rpoB- nu(A)                       | hla-hlb-hld-lukED-cna                               | P23 | t3380 |   |
| NZ11 | raw milk | cap5 | 五  | gyrA-gyrB-grlA-grlB-aphA-rpoB                                             | seb-sem-sen-hla-hlb-hld-lukED-ebp-clfA-clfB         | P33 | t164  |   |
| NZ12 | raw milk | cap8 | 八  | gyrA-gyrB-grlA-grlB-ermC-rpoB-lnu(A)                                      | hla-hlb-hld-lukED-cna-ebp-clfA-clfB                 | P25 | t189  |   |
| NZ13 | raw milk | *    | 十一 | tetM                                                                      | -                                                   | P18 | -     |   |
| NZ14 | raw milk | cap5 | 十  | -                                                                         | -                                                   | -   | -     |   |
| NZ15 | raw milk | cap8 | 十  | mecA-gyrA-gyrB-grlB-qnrB-qnrS-aphA-tetM-ermB-Tn 5801                      | -                                                   | P9  | t164  | I |
| NZ16 | raw milk | cap5 | 九  | gyrA-tetM-Tn 5801                                                         | -                                                   | -   | -     |   |
| NZ17 | raw milk | cap5 | 十  | oqxA                                                                      | -                                                   | P2  | -     |   |
| NZ18 | raw milk | cap5 | 八  | oqxA                                                                      | -                                                   | P5  | -     |   |
| NZ19 | raw milk | cap5 | 九  | oqxA-aphA-tetM-ermB                                                       | -                                                   | P2  | -     |   |
| NZ20 | raw milk | cap5 | 六  | -                                                                         | -                                                   | -   | t164  |   |
| NZ21 | raw milk | cap5 | 五  | qnrB-aphA                                                                 | -                                                   | P45 | -     |   |
| NZ22 | raw milk | cap5 | 九  | gyrA-grlA-grlB-acc(6')-aph(2'')-tetM-ermB-rpoB                            | hla-hlb-hld-lukED-clfA                              | P28 | t8139 |   |
| NZ23 | raw milk | *    | 八  | gyrA-rpoB                                                                 | -                                                   | P28 | -     |   |
| NZ24 | raw milk | cap5 | 十  | gyrA-acc(6')-aph(2'')-aphA-tetM                                           | cna-clfA                                            | P28 | t164  |   |
| NZ25 | raw milk | cap5 | 九  | gyrA-grlB-aphA-tetM-ermB                                                  | hla-hlb-hld-can-ebp-clfA-clfB                       | -   | t164  |   |
| NZ26 | raw milk | cap5 | 六  | gyrA-tetM                                                                 | hla-hlb-hld-can-ebp-clfA-clfB                       | -   | t164  |   |
| NZ27 | raw milk | cap8 | 九  | gyrA-grlA-grlB-acc(6')-aph(2'')-rpoB                                      | hla-hlb-hld-lukED-can-ebp-clfA-clfB                 | P1  | t189  |   |
| NC1  | raw milk | cap5 | 六  | grlB-qnrS-aphA-tetK-ermB-ermC                                             | hld-lukED                                           | P26 | t091  |   |
| NC2  | raw milk | cap5 | 七  | grlA-aphA-ermB-ermC-rpoB                                                  | seb-sep-set-lukED-ebp-clfA-clfB                     | P26 | t091  |   |
| NC3  | raw milk | cap5 | 八  | gyrA-gyrB-grlA-grlB-aphA-tetK-ermB-ermC-rpoB                              | seb-sep-set-hla-hlb-hld-lukED-ebp-clfA-clfB         | P26 | t091  |   |
| NC4  | raw milk | cap5 | 六  | gyrA-gyrB-grlB-acc(6')-aph(2'')-aphA-tetK-tetM-ermB-ermC                  | seb-sed-set-hld-lukED-can-ebp-clfB                  | P21 | t091  |   |
| NC5  | raw milk | cap8 | 八  | gyrA-gyrB-grlA-grlB-aphA-tetK-tetM-ermB-ermC                              | seb-see-sep-set-hld-lukED-can-ebp-clfA-clfB         | P6  | t899  |   |
| NC6  | raw milk | cap5 | 八  | oqxA-oqxB-gyrA-grlA-grlB-aphA-ermB-rpoB                                   | set-hld-hlg-cna                                     | -   | t034  |   |
| NC7  | raw milk | *    | 四  | aphA                                                                      | seb-cna                                             | -   | t3512 |   |
| NC8  | raw milk | cap5 | 八  | gyrA-gyrB-grlA-grlB-qnrS-tetK-tetM-ermB-ermC-rpoB                         | hla-hld                                             | P26 | t034  |   |
| NC9  | raw milk | *    | 六  | qnrS-aphA                                                                 | hld                                                 | P26 | -     |   |
| NC10 | raw milk | cap5 | 三  | gyrA-gyrB-grlA-grlB-acc(6')-aph(2'')-tetK-ermB-ermC-rpoB                  | sed-sej-sen-sep-set-hla-hlb-hlg-lukED-ebp-clfA-clfB | P26 | t034  |   |
| NC11 | raw milk | cap5 | 八  | gyrA-gyrB-grlA-grlB-aphA-tetK-tetM-ermC-rpoB                              | hld-lukED-ebp-clfA-clfB                             | P26 | t034  |   |
| NC12 | raw milk | cap5 | 八  | gyrA-gyrB-grlA-grlB-aphA-tetK-ermC-rpoB                                   | hla-hlb-hld-ebp-clfA-clfB                           | P26 | t034  |   |
| NK1  | raw milk | cap5 | 三  | gyrA-gyrB-grlA-grlB-rpoB                                                  | seb-see-set-hld-hlg-lukED-can-ebp-clfA-clfB         | P8  | t189  |   |
| NK2  | raw milk | cap5 | 五  | gyrA-gyrB-grlA-grlB-aphA-tetM-ermB-rpoB                                   | seb-set-hld-hlg-lukED-can-ebp-clfA-clfB             | P8  | t189  |   |
| NK3  | raw milk | cap5 | 八  | qnrS-acc(6')-aph(2'')-aphA-tetM-ermB                                      | seb-sed-sej-sep-set-hlg-lukED-can-ebp-clfB          | P8  | t8139 |   |
| NK4  | raw milk | cap5 | 八  | gyrA-gyrB-grlA-grlB-aphA-tetM-ermB-rpoB                                   | seb-set-hld-lukED-can-ebp-clfB                      | P8  | t189  |   |
| NK5  | raw milk | cap5 | 九  | gyrA-gyrB-grlA-grlB-tetM-ermB-ermC-rpoB                                   | seb-set-hla-hlb-hld-lukED-can-ebp-clfA-clfB         | P8  | t189  |   |
| NK6  | raw milk | *    | 三  | gyrA-gyrB-grlA-grlB-aphA-ermB-rpoB                                        | seb-hld                                             | P8  | -     |   |
| NK7  | raw milk | cap5 | 六  | gyrA-gyrB-grlA-grlB-aphA-tetM-ermB-rpoB                                   | seb-see-set-hld-lukED-can-ebp-clfA-clfB             | P8  | t189  |   |
| NK8  | raw milk | cap5 | 五  | qnrS-acc(6')-aph(2'')-aphA-tetM-ermB                                      | sed-sej-sep-set-hlg-cna                             | P8  | t6367 |   |
| NK9  | raw milk | cap5 | 八  | blaZ-gyrA-gyrB-grlA-grlB-acc(6')-aph(2'')-aphA-tetM-ermB-ermC-rpoB-Tn 552 | seb-hla-hlb-hld-lukED-can-ebp-clfA-clfB             | P8  | t189  |   |
| NK10 | raw milk | cap5 | 九  | gyrA-gyrB-grlA-grlB-rpoB                                                  | seb-hld-lukED-can-ebp-clfA-clfB                     | P8  | t189  |   |

|      |          |      |    |                                                                                                                  |                                                             |     |        |
|------|----------|------|----|------------------------------------------------------------------------------------------------------------------|-------------------------------------------------------------|-----|--------|
| NK11 | raw milk | cap5 | 六  | gyrA-gyrB-grlA-grlB-tetM-rpoB-Tn 5801                                                                            | seb-hla-hld-lukED-can-ebp-clfA-clfB                         | P8  | t189   |
| Z1   | pig      | cap5 | 八  | gyrA-gyrB-grlA-grlB-fexA-acc(6')-aph(2'')-aphA-tetM-ermA-ermB-ermC-rpoB-bcrB                                     | sed-sej-sem-sen-set-hla-hld-lukED-ebp-clfA-clfB             | P1  | t15075 |
| Z2   | pig      | cap5 | 八  | gyrA-grlA-grlB-fexA-ant(4')-Ia-aphA-tetK-tetM-ermA-ermB-ermC-rpoB-bcrB-lnu(A)-Tn 552                             | sep-hla-hld-lukED-can-ebp-clfA-clfB                         | P4  | t091   |
| Z3   | pig      | cap5 | 八  | gyrA-grlA-grlB-fexA-acc(6')-aph(2'')-aphA-ermA-ermB-ermC-rpoB-bcrB-                                              | sed-sej-hla-hld-lukED-ebp-clfA-clfB                         | P1  | t15075 |
| Z4   | pig      | cap5 | 三  | gyrA-gyrB-grlA-grlB-ermC-rpoB                                                                                    | sed-sej-sem-sen-set-hla-hlb-hld-lukED-ebp-clfA-clfB         | P1  | t15075 |
| Z5   | pig      | cap5 | 八  | gyrA-gyrB-grlA-grlB-fexA-acc(6')-aph(2'')-ant(4')-Ia-aphA-tetK-tetM-ermA-ermB-ermC-rpoB-bcrB-lnu(A)-class I      | sed-sej-hla-hld-lukED-ebp-clfA-clfB                         | P4  | t15075 |
| Z6   | pig      | cap5 | 九  | gyrA-gyrB-grlA-grlB-fexA-acc(6')-aph(2'')-ant(4')-Ia-aphA-tetK-tetM-ermA-ermB-ermC-rpoB-bcrB-lnu(A)              | sed-sej-hla-hld-ebp-clfA-clfB                               | P1  | t15075 |
| Z7   | pig      | cap5 | 七  | gyrA-gyrB-grlA-grlB-fexA-ant(4')-Ia-ermC-rpoB-Tn 552                                                             | hla-hlb-hld-ebp-clfA-clfB                                   | P32 | t899   |
| Z8   | pig      | cap5 | 九  | gyrA-gyrB-grlA-grlB-fexA-acc(6')-aph(2'')-ant(4')-Ia-aphA-tetK-tetM-ermA-ermB-ermC-rpoB-bcrB-lnu(A)              | sed-sej-sep-hla-hld-lukED-can-clfA                          | P4  | t034   |
| Z9   | pig      | cap5 | 八  | gyrA-grlA-grlB-fexA-acc(6')-aph(2'')-ant(4')-Ia-aphA-tetK-tetM-ermA-ermB-ermC-rpoB-bcrB-lnu(A)-optrA             | sep-set-hla-hlb-hld-hlg-lukED-can-ebp-clfA-clfB             | P4  | t034   |
| Z10  | pig      | cap5 | 六  | gyrA-gyrB-grlA-grlB-ant(4')-Ia-tetK-ermC-rpoB-lnu(A)-Tn 552                                                      | sep-set-hla-hld-can-ebp-clfA-clfB                           | P35 | t091   |
| Z11  | pig      | cap5 | 十  | gyrA-gyrB-grlA-grlB-fexA-acc(6')-aph(2'')-ant(4')-Ia-aphA-tetK-tetM-ermA-ermB-ermC-rpoB-bcrB-lnu(A)-optrA-Tn 552 | sed-sej-sep-set-hla-hlb-hld-hlg-lukED-can-ebp-clfA-clfB     | P5  | t034   |
| Z12  | pig      | cap5 | 九  | gyrA-gyrB-grlA-grlB-fexA-ant(4')-Ia-ermC-rpoB-Tn 552                                                             | hla-hlb-hld-ebp-clfA-clfB                                   | P5  | t3512  |
| Z13  | pig      | cap8 | 七  | gyrA-gyrB-grlA-grlB-ant(4')-Ia-tetK-ermC-rpoB-lnu(A)-Tn 552                                                      | sep-hla-ebp-clfA-clfB                                       | P26 | t091   |
| Z14  | pig      | cap5 | 六  | gyrA-gyrB-grlA-grlB-rpoB                                                                                         | hla-clfA                                                    | P27 | t034   |
| Z15  | pig      | cap5 | 八  | gyrA-gyrB-grlA-grlB-fexA-acc(6')-aph(2'')-aphA-tetM-ermA-ermB-rpoB-bcrB-class I                                  | sed-see-sej-set-hla-hlb-hld-hlg-lukED-can-ebp-clfA-clfB     | -   | t034   |
| Z16  | pig      | cap5 | 十  | gyrA-gyrB-grlA-grlB-fexA-acc(6')-aph(2'')-aphA-tetK-etM-ermA-ermB-ermC-rpoB-bcrB-optrA-class I                   | sed-sej-sem-sen-sep-set-hla-hlb-hld-lukED-can-ebp-clfA-clfB | P2  | t15075 |
| Z17  | pig      | cap8 | 七  | gyrA-gyrB-grlA-grlB-ant(4')-Ia-tetK-ermC-rpoB-lnu(A)                                                             | sep-hla-hld-lukED-ebp-clfA-clfB                             | P5  | t091   |
| Z18  | pig      | cap5 | 九  | gyrA-gyrB-grlA-grlB-fexA-acc(6')-aph(2'')-aphA-tetK-tetM-ermA-ermB-ermC-rpoB-bcrB                                | sed-sej-hla-hld-lukED-ebp-clfA-clfB                         | P1  | t15075 |
| Z19  | pig      | cap5 | 十  | gyrA-gyrB-grlA-grlB-fexA-acc(6')-aph(2'')-aphA-tetM-ermA-ermB-ermC-rpoB-bcrB                                     | hld-lukED-ebp-clfA-clfB                                     | P2  | t15075 |
| Z20  | pig      | cap5 | 七  | gyrA-gyrB-grlA-grlB-ermC-rpoB                                                                                    | sed-sej-hla-hld-lukED-ebp-clfA-clfB                         | P2  | t15075 |
| Z21  | pig      | cap8 | 七  | gyrA-gyrB-grlA-grlB-ant(4')-Ia-tetK-ermC-rpoB-lnu(A)-Tn 552                                                      | sep-hla-hld-ebp-clfA-clfB                                   | P13 | t091   |
| Z22  | pig      | cap5 | 十一 | gyrA-gyrB-grlA-grlB-fexA-aac(6')-Ib-cr-acc(6')-aph(2'')-aphA-tetM-ermA-ermB-ermC-bcrB-class I                    | sed-sej-hld-lukED-ebp-clfA-clfB                             | P45 | t15075 |
| J1   | chicken  | cap5 | 十  | blaZ-gyrA-gyrB-grlA-grlB-fexA-acc(6')-aph(2'')-ant(4')-Ia-aphA-tetK-tetM-ermA-ermB-ermC-rpoB-bcrB-optrA          | sep-set-hla-hlb-hld-hlg-lukED-can-ebp-clfA-clfB             | P12 | t034   |
| J2   | chicken  | cap5 | 四  | gyrA-gyrB-grlA-grlB-ermC-rpoB                                                                                    | sed-sej-hla-hld-lukED-ebp-clfA-clfB                         | P1  | t2646  |
| J3   | chicken  | cap5 | 十  | gyrA-gyrB-grlA-grlB-fexA-acc(6')-aph(2'')-aphA-tetM-ermB-rpoB-bcrB-optrA                                         | sed-sej-sen-hla-hld-lukED-ebp-clfA-clfB                     | P1  | t15075 |
| J4   | chicken  | cap5 | 八  | grlA-grlB- acc(6')-aph(2'')-ermB-rpoB-lnu(A)                                                                     | set-hla-hlb-hld-hlg-can-ebp-clfA-clfB                       | -   | t034   |
| J5   | chicken  | cap5 | 十  | blaZ-gyrA-gyrB-grlA-grlB-fexA-acc(6')-aph(2'')-aphA-tetM-ermA-ermB-ermC-rpoB-bcrB                                | sed-sej-sem-sen-hla-hld-lukED-ebp-clfA-clfB                 | P1  | t15075 |
| J6   | chicken  | cap5 | 九  | blaZ-gyrA-gyrB-grlA-grlB-fexA-acc(6')-aph(2'')-aphA-tetM-ermA-ermB-ermC-rpoB-bcrB-optrA                          | sed-sej-sem-sep-set-hla-hlb-hld-lukED-ebp-clfB              | P1  | t15075 |

|     |           |      |    |                                                                                                                                               |                                                          |     |        |     |
|-----|-----------|------|----|-----------------------------------------------------------------------------------------------------------------------------------------------|----------------------------------------------------------|-----|--------|-----|
| J7  | chicken   | cap5 | 五  | blaZ-gyrA-gyrB-grlA-grlB-ermC-rpoB                                                                                                            | sed-sej-set-hla-hlb-hld-lukED-ebp-clfA-clfB              | P1  | t15075 |     |
| J8  | chicken   | cap5 | 十  | gyrA-gyrB-grlA-grlB-fexA-acc(6')-aph(2'')-aphA-tetM-ermA-ermB-ermC-rpoB-bcrB                                                                  | sed-sej-hla-lukED-ebp-clfB                               | P1  | t15075 |     |
| J9  | chicken   | cap5 | 四  | gyrA-gyrB-grlA-grlB-ermC-rpoB                                                                                                                 | sed-sej-sem-sen-set-hla-hld-lukED-ebp-clfA-clfB          | P1  | t15075 |     |
| J10 | chicken   | cap8 | 十  | blaZ-gyrA-gyrB-grlA-grlB-ant(4')-Ia-tetK-ermC-rpoB                                                                                            | sep-hla-hld-ebp-clfA-clfB                                | P4  | t034   |     |
| J11 | chicken   | cap5 | 十  | gyrA-gyrB-grlA-ant(4')-Ia-tetK-ermC-rpoB-lnu(A)                                                                                               | sed-sej-sem-sen-sep-hla-hld-lukED-ebp-clfB               | P1  | t15075 |     |
| J12 | chicken   | cap5 | 十  | blaZ-gyrA-gyrB-grlA-grlB-fexA-acc(6')-aph(2'')-ant(4')-Ia-aphA-tetM-ermA-ermB-ermC-rpoB-bcrB                                                  | sed-sej-hla-hld-lukED-ebp-clfA-clfB                      | P1  | t15075 |     |
| J13 | chicken   | cap5 | 四  | gyrA-gyrB-grlA-grlB-ermC-rpoB                                                                                                                 | sed-sej-sem-sen-set-hla-hlb-lukED-ebp-clfA-clfB          | P1  | t15075 |     |
| J14 | chicken   | *    | 六  | mecA-gyrA-ant(4')-Ia-rpoB                                                                                                                     | -                                                        | P38 | -      | II  |
| J15 | chicken   | cap5 | 十一 | oqxA-oqxB-gyrA-gyrB-grlA-grlB-fexA-aac(6')-Ib-cr-acc(6')-aph(2'')-ant(4')-Ia-aphA-tetM-ermA-ermB-ermC-bcrB-optrA-class I                      | sed-sej-sen-set-hla-hld-lukED-ebp-clfA-clfB              | P1  | t15075 |     |
| 1   | waterfowl | *    | 十一 | oqxB-qnrA-qnrB-qnrS-acc(6')-aph(2'')-aphA-tetK-tetM-ermA-ermB-vga(A)-lnu(B)-class I-class II-class III-Tn 916-like-Tn 5801                    | -                                                        | P43 | t189   |     |
| 2   | waterfowl | *    | 六  | aac(6')-Ib-cr-qnrA-qnrB-acc(6')-aph(2'')-ant(4')-Ia-aphA-tetM-ermA-ermB-vga(A)- class I-class II-class III-Tn 916-like-Tn 5801                | -                                                        | P41 | -      |     |
| 3   | waterfowl | cap8 | 十  | aac(6')-Ib-cr-qnrA-qnrB-qnrS-acc(6')-aph(2'')-ant(4')-Ia-aphA-tetM-ermA-ermB-vga(A)-bcrB-optrA-class I-class II-class III-Tn 916-like-Tn 5801 | cna                                                      | P39 | t189   |     |
| 4   | waterfowl | *    | 十一 | gyrB-aac(6')-Ib-cr-qnrA-acc(6')-aph(2'')-ant(4')-Ia-aphA-tetK-tetM-ermA-ermB-vga(A)-bcrB-optrA-class I-class II-class III-Tn 916-like-Tn 5801 | cna                                                      | P36 | t189   |     |
| 5   | waterfowl | *    | 十  | oqxB-qnrA-qnrB-qnrS-acc(6')-aph(2'')-aphA-tetM-ermA-ermB-vga(A)-optrA-class I-class II-class III-Tn 5801                                      | cna                                                      | -   | t189   |     |
| 6   | waterfowl | *    | 十一 | oqxB-qnrA-acc(6')-aph(2'')-ant(4')-Ia-aphA-tetK-tetM-ermA-ermB-vga(A)-class I-class II-class III-Tn 916-like-Tn 5801                          | -                                                        | P39 | -      |     |
| 7   | waterfowl | *    | 九  | gyrA-qnrA-acc(6')-aph(2'')-ant(4')-Ia-aphA-tetM-ermA-ermB-vga(A)-class I-class II-class III-Tn 5801                                           | -                                                        | -   | -      |     |
| 8   | waterfowl | cap8 | 十  | oqxB-aac(6')-Ib-cr-qnrA-qnrS-acc(6')-aph(2'')-aphA-tetM-ermA-ermB-vga(A)-vga(C)-class I-class II-class III-Tn 916-like-Tn 5801                | see-set                                                  | P22 | t3512  |     |
| 9   | waterfowl | *    | 七  | oqxB-qnrA-acc(6')-aph(2'')-aphA-tetM-ermA-ermB-vga(A)-vga(C)-lnu(B)-class I-class II-class III-Tn 916-like-Tn 5801                            | see-set                                                  | -   | t3512  |     |
| 10  | waterfowl | *    | 十一 | oqxB-aac(6')-Ib-cr-qnrA-acc(6')-aph(2'')-ant(4')-Ia-aphA-tetM-ermA-ermB-vga(A)-vga(C)-lnu(B)-optrA-class I-class II-class III                 | sed-see-set-cna                                          | P40 | t189   |     |
| 11  | waterfowl | *    | 十  | oqxB-gyrA-qnrA-acc(6')-aph(2'')-aphA-tetM-ermB-vga(C)-class I-class II-class III-Tn 916-like                                                  | set                                                      | P42 | t3512  |     |
| 12  | waterfowl | cap5 | 十一 | oqxB-gyrB-aac(6')-Ib-cr-qnrA-acc(6')-aph(2'')-aphA-tetM-ermA-ermB-ermC-vga(A)-lnu(B)-class I-class II-class III                               | -                                                        | P3  | t2224  |     |
| 13  | waterfowl | cap5 | 十  | oqxB-qnrA-acc(6')-aph(2'')-aphA-tetM-ermA-ermB-vga(A)-class I-class II-class III-Tn 916-like-Tn 5801                                          | lukED-ebp-clfA-clfB                                      | P15 | t267   |     |
| ZY1 | human     | cap8 | 八  | mecA-gyrA-grlA-grlB-aphA-ermB-rpoB-class I                                                                                                    | seb-set-hla-hlb-hld-pvl-ebp-clfA-clfB                    | P11 | t437   | IVa |
| ZY2 | human     | cap5 | 十一 | gyrA-grlA-aphA-ermA-rpoB-class I-Tn 5801                                                                                                      | sea-sec-set-tsst-hld-lukED-can-ebp-clfA-clfB             | P14 | t030   |     |
| ZY3 | human     | cap5 | 十一 | mecA-gyrA-grlA-grlB-tetM-ermA-rpoB-class I-Tn 5801                                                                                            | sea-sec-tsst-hld-lukED-can-ebp-clfA-clfB                 | P14 | t030   | IVa |
| ZY4 | human     | cap5 | 十  | rpoB-Tn 5801                                                                                                                                  | sea-sec-sen-set-tsst-hla-hlb-hld-lukED-can-ebp-clfA-clfB | P17 | t030   |     |
| ZY5 | human     | *    | 五  | acc(6')-aph(2'')-tetK-tetM-ermB-rpoB-Tn 916-like                                                                                              | -                                                        | P16 | -      |     |

|      |       |      |   |                                                               |                                             |     |       |     |
|------|-------|------|---|---------------------------------------------------------------|---------------------------------------------|-----|-------|-----|
| ZY6  | human | cap8 | 七 | gyrA-gyrB-grlA-grlB-ermC-rpoB-class I                         | sep-set-hla-hlb-hld-lukED-pvl-ebp-clfA-clfB | P14 | t3155 |     |
| ZY7  | human | cap8 | 九 | mecA-gyrA-gyrB-grlA-grlB-tetK-ermB-ermC-rpoB-class I-class II | seb-sep-hla-hld-lukED-pvl-ebp-clfA-clfB     | P16 | t3155 | IVa |
| ZY8  | human | *    | 五 | -                                                             | -                                           | P37 | -     |     |
| ZY9  | human | cap8 | 三 | rpoB                                                          | hla-pvl-clfA                                | P16 | t3155 |     |
| ZY10 | human | cap8 | 九 | mecA-gyrA-grlA-grlB-ermC-rpoB-class II                        | seb-hla-hlb-hld-lukED-pvl-ebp-clfA-clfB     | P16 | t3155 | III |
| ZY11 | human | *    | 十 | gyrA-gyrB-grlA-grlB-tetK-ermC-rpoB-class II                   | clfA                                        | P34 | t2193 |     |
| ZY12 | human | *    | 六 | mecA-gyrA-grlA-grlB-ermC-rpoB-class II                        | ebp-clfA-clfB                               | P16 | t3155 | III |
| ZY13 | human | cap8 | 七 | mecA-gyrA-gyrB-grlA-grlB-aphA-tetK-ermB-rpoB                  | Hlb-hld-pvl-ebp-clfA-clfB                   | P10 | t3527 | -   |

“\*” non-cap5 and non-cap8

“-” unable to typing or not determined
