# Supplementary material for: Prevalence, resistance pattern, and molecular characterization of Staphylococcus aureus isolates from healthy animals and sick populations in Henan Province, China
Source: Springer Nature journal article supplement (doi:10.1186/s13099-018-0254-9), 2018-07-17
Supplement: MOESM2 [file 15959636]

**Table S2.** A list of the thirty-three tested antimicrobials, their classes, and the concentrations used for susceptibility testing of*Staphylococcus aureus*

| Antimicrobial categories         | Antibiotics                              | Abbreviation | Content (%)     | Concentration range (µg/mL) |
|----------------------------------|------------------------------------------|--------------|-----------------|-----------------------------|
| Penicillins                      | penicillin                               | PEN          | 90%             | 0.125-256                   |
|                                  | methicillin                              | MEC          | 85%             | 0.25-512                    |
|                                  | oxacillin                                | OXA          | 90%             | 0.25-512                    |
| Cephalosporins                   | ceftriaxone                              | CRO          | 90%             | 0.0625-128                  |
|                                  | ceftiofur                                | CEF          | 98%             | 0.0625-128                  |
|                                  | cefquinome                               | CEQ          | 90%             | 0.0625-128                  |
|                                  | cefepime                                 | CEP          | 90%             | 0.0625-128                  |
| β-lactams/β-Lactamase inhibitors | Imipenem                                 | IMP          | 90%             | 0.0625-128                  |
|                                  | Cefoperazone and Sulbactam Sodium (2:1)  | -            | 90%             | 0.0625-128                  |
|                                  | Piperacillin and Tazobactam Sodium (4:1) | -            | 90%             | 0.0625-128                  |
| Fluoroquinolones                 | ciprofloxacin                            | CIP          | 88.4%           | 0.0625-128                  |
|                                  | enrofloxacin                             | ENO          | 98%             | 0.0625-128                  |
|                                  | levofloxacin                             | LEV          | 90%             | 0.0625-128                  |
| Aminoglycosides                  | gentamicin                               | GEN          | 65%             | 0.25-512                    |
|                                  | amikacin                                 | AMK          | 60%             | 0.0625-128                  |
|                                  | neomycin                                 | NEM          | 65%             | 0.0625-128                  |
| Amphenicols                      | chloramphenicol                          | CHL          | 90%             | 0.0625-128                  |
|                                  | florfenicol                              | FLO          | 98%             | 0.0625-128                  |
| Macrolides                       | tylosin                                  | TYL          | 95%             | 0.0625-128                  |
|                                  | erythromycin                             | ERY          | 90%             | 0.0625-128                  |
| Lincosamides                     | Lincomycin                               | LIN          | 90%             | 0.0625-128                  |
| Tetracyclines                    | tetracycline                             | TET          | 87.8%           | 0.25-512                    |
|                                  | terramycine                              | TER          | 85%             | 0.0625-128                  |
|                                  | doxycyclin                               | DOX          | 80%             | 0.0625-128                  |
|                                  | tigecycline                              | TGC          | 94%             | 0.0625-128                  |
| Quinoxalines                     | olaquinox                                | OLA          | 80%             | 0.0625-128                  |
|                                  | mequinox                                 | MEQ          | 80%             | 0.0625-128                  |
| independent class of antibiotics | fosfomycin                               | FOS          | 90%             | 0.25-512                    |
| Rifamycines                      | rifampicin                               | RIF          | 90%             | 0.0625-128                  |
| polypeptides                     | vancomycin                               | VAN          | 90%             | 0.0625-128                  |
|                                  | Bacitracin                               | BAT          | 61 units per mg | 0.25-512                    |
|                                  | antimicrobial peptide                    | APT          | 90%             | 0.0625-128                  |
| Oxazolidinones                   | linezolid                                | LZD          | 99%             | 0.0625-128                  |
