# Supplementary material for: Prevalence, resistance pattern, and molecular characterization of Staphylococcus aureus isolates from healthy animals and sick populations in Henan Province, China
Source: Springer Nature journal article supplement (doi:10.1186/s13099-018-0254-9), 2018-07-17
Supplement: MOESM3 [file 15959636]

**Table S3.** Oligonucleotide Sequences, primers, and targets for Polymerase Chain Reaction Amplification of Antibiotic resistance genes and integrons in *Staphylococcus aureus* Isolates

| Gene          | Primer name      | Oligonucleotide sequence (5'→3') | Amplicon size (bp) | Reference  |
|---------------|------------------|----------------------------------|--------------------|------------|
| oqxA          | oqxA-F           | GGGGAAACATTCACCTGAC              | 407                | This study |
|               | oqxA-R           | ACGGGAGACGAGGTTGGTA              |                    |            |
| oqxB          | oqxB-F           | TTCTCCCCCGGCGGGAAGTAC            | 513                | This study |
|               | oqxB-R           | CTCGGCCATTTTGGCGCGTA             |                    |            |
| ermA          | ermA-F           | GTTCAAGAACAATCAATACAGAG          | 421                | 1          |
|               | ermA-R           | GGATCAGGAAAAGGACATTTTAC          |                    |            |
| ermB          | ermB-F           | GAAAAGGTACTCAACCAAATA            | 639                | 1          |
|               | ermB-R           | AGTAACGGTACTTAAATTGTTTAC         |                    |            |
| ermC          | ermC-F           | GCTAATATTGTTTAAATCGTCAATTCC      | 572                | 1          |
|               | ermC-R           | GGATCAGGAAAAGGACATTTTAC          |                    |            |
| blaZ          | blaZ-F           | TCAAACAGTTCACATGCC               | 800                | This study |
|               | blaZ-R           | TTCATTACACTCTGGCG                |                    |            |
| vanA          | vanA-F           | CATGACGTATCGGTAAAATC             | 885                | 2          |
|               | vanA -R          | ACCGGCAGCGTATTGAC                |                    |            |
| fosB          | fosB-F           | ACCGGTACTTTACAAGAGCGT            | 660                | This study |
|               | fosB-R           | AACAGCACCATCACTTCCTT             |                    |            |
| rpoB          | rpoB-F           | CCGTATCGGTTTATCAAGAATG           | 432                | This study |
|               | rpoB-R           | TCAACTTTACGATATGGTGTTT           |                    |            |
| cfr           | cfr-F            | TGAAGTATAAAGCAGGTTGGGAGTCA       | 746                | 3          |
|               | cfr-R            | ACCATATAATTGACCACAAGCAGC         |                    |            |
| tetK          | tetK-F           | TAGGGGGAATAATAGCACATT            | 587                | 4          |
|               | tetK-R           | AATCCGCCATAACAAATA               |                    |            |
| tetM          | tetM-F           | GAACTCGAACAAGAGGAAAAGC           | 717                | 4          |
|               | tetM-R           | ATGGAAGCCAGAAAGGAT               |                    |            |
| aac(6')-Ib-cr | aac(6')-Ib-cr -F | TTGCGATGCTCTATGAGTGGCTA          | 482                | This study |
|               | aac(6')-Ib-cr -R | CTCGAATGCCTGGCGTGTTT             |                    |            |
| qepA          | qepA-F           | CTGCAGGTACTGCGTCATG              | 403                | This study |
|               | qepA-R           | CGTGTTGCTGGAGTTCTTC              |                    |            |
| qnrA          | qnrA-F           | CAAGAGGATTTCTCACGCCAG            | 628                | This study |
|               | qnrA-R           | AATCCGGCAGCACTATTACTCC           |                    |            |
| qnrB          | qnrB-F           | AGCGGCACTGAATTTATCGG             | 418                | This study |
|               | qnrB-R           | CGCAATGTGTGAAGTTTGCT             |                    |            |
| qnrC          | qnrC-F           | GGGTT GTACA TTTAT TGAATCG        | 449                | 5          |

|                  |                    |                                |     |            |
|------------------|--------------------|--------------------------------|-----|------------|
|                  | qnrC-R             | AATCC ACTTT ACGAG GTTCT        |     |            |
| qnrD             | qnrD-F             | CACGAGATCAATTTACGGGGAA         | 572 | This study |
|                  | qnrD-R             | CGCCTGCTCTCCATCCAAC            |     |            |
| qnrS             | qnrS-F             | CATTGAACAGGGTGATATCGAA         | 395 | This study |
|                  | qnrS-R             | ATAAATTGGCACCCCTGTAGGC         |     |            |
| gyrA             | gyrA-F             | AATGAACAAGGTATGACACC           | 203 | This study |
|                  | gyrA-R             | TACGCGCTTCAGTATAACGC           |     |            |
| gyrB             | gyrB-F             | CAGCGTTAGATGTAGCAAGC           | 231 | This study |
|                  | gyrB-R             | CCGATTCCCTGTACCAAATGC          |     |            |
| grlA             | grlA-F             | ACTTGAAGATGTTTTAGGTGAT         | 538 | This study |
|                  | grlA-R             | TTAGGAAATCTTGATGGCAA           |     |            |
| grlB             | grlB-F             | CGATTAAAGCACACAAGCAAG          | 353 | This study |
|                  | grlB-R             | CATCAGTCATAATAATTACTC          |     |            |
| acc(6')-aph(2'') | acc(6')-aph(2'')-F | CCAAGAGCAATAAGGGCATAACC        | 675 | 6          |
|                  | acc(6')-aph(2'')-R | ACCCTCAAAAACCTGTTGTTGC         |     |            |
| ant(4')-Ia       | ant(4')-Ia-F       | GGAAGCAGAGTTCAGCCATG           | 266 | 6          |
|                  | ant(4')-Ia-R       | TGCCTGCATATTCAAACAGC           |     |            |
| aphA             | aphA-F             | ACAGCCGGTATAAAGGGACCACC        | 382 | 7          |
|                  | aphA-R             | AAAATCATAACAGCTCGCGCGGATC      |     |            |
| vga(A)           | vga(A)-F           | CTTCAATTGGGATCCTCAGGATAGG      | 631 | 8          |
|                  | vga(A)-R           | GTTATGGTACCTTCTTGTTAGG         |     |            |
| vga(B)           | vga(B)-F           | GAATAAGGCGCAAGGAATGA           | 601 | 9          |
|                  | vga(B)-R           | TAGCTTGGCAAAAGCAACCT           |     |            |
| vga(C)           | vga(C)-F           | TAAGTTCATCGGAAGCAA             | 671 | 9          |
|                  | vga(C)-R           | GGATTCAAACGCCTCTAT             |     |            |
| vga(D)           | vga(D)-F           | CAACTGGAGCGAGCTGTTA            | 201 | 10         |
|                  | vga(D)-R           | GACAGCCGGATAATCTTTTG           |     |            |
| lnu(A)           | lnu(A)-F           | GGTGGCTGGGGGGTAGATGTATTAACCTGG | -   | 11         |
|                  | lnu(A)-R           | GCTTCTTTTGAATACATGGTATTTTCGATC |     |            |
| lnu(B)           | lnu(B)-F           | CCTACCTATTGTTTGTGGAA           | -   | 11         |
|                  | lnu(B)-R           | ATAACGTTACTCTCCTATTC           |     |            |
| lnu(C)           | lnu(C)-F           | ACTGTTCGAGAGCAGGAAAGCC         | -   | 11         |
|                  | lnu(C)-R           | AGCATCTACACCCAGCCACCA          |     |            |
| lnu(D)           | lnu(D)-F           | ACGGAGGGATCACATGGTAAATAAAGC    | -   | 11         |
|                  | lnu(D)-R           | CCTGTCTTTATCGTCCTTCCAAACCGT    |     |            |
| bcrA             | bcrA-F             | CCGCAATGAAAATGATGTTG           | 584 | 12         |

|             |               |                            |      |            |
|-------------|---------------|----------------------------|------|------------|
|             | bcrA-R        | TGCGGCTATCTTACCATCTG       |      |            |
| bcrB        | bcrB-F        | AAAGAAACCGACTGCTGATA       | 489  | 12         |
|             | bcrB-R        | GCTTACTTGTATAGCAGAGA       |      |            |
| bcrD        | bcrD-F        | GCGAAGCGTTTAAGGAAATG       | 482  | 12         |
|             | bcrD-R        | TGGCACAGCAAGAAAGAATG       |      |            |
| bcrR        | bcrR-F        | TAACGCAGGAACAACCTTGC       | 461  | 12         |
|             | bcrR-R        | CAAAGCGGTAATGGTGAGG        |      |            |
| class I     | class I-F     | CCTCCCGCACGATGATC          | 288  | 13         |
|             | class I-R     | TCCACGCATCGTCAGGC          |      |            |
| class II    | class II-F    | GTAGCAAACGAGTGACGAAATG     | 788  | 13         |
|             | class II-R    | CACGGATATGCGACAAAAAGGT     |      |            |
| class III   | class III-F   | GCCTCCGGCAGCGACTTTCAG      | 979  | 13         |
|             | class III-R   | ACGGATCTGCCAAACCTGACT      |      |            |
| Tn 552      | Tn 552-F      | CTAACTAATTTTTCTGAAGCCAAACG | 1360 | 7          |
|             | Tn 552-R      | TTTAAGTGTTTTCTTCTCTGACTACG |      |            |
| Tn 5801     | Tn 5801-F     | CCGATATTGAGCCTATTGATGTG    | 722  | 14         |
|             | Tn 5801-R     | GTCCATACGTTCCCTAAAGTCGTC   |      |            |
| Tn 916-like | Tn 916-like-F | GCCATGACCTATCTTATA         | 1057 | 14         |
|             | Tn 916-like-R | CTAGATTGCGTCCAA            |      |            |
| optrA       | optrA-F       | GCACCAGACCAATACGATACAA     | 794  | This study |
|             | optrA-R       | TCCTTCTTAACCTTCTCCTTCTCA   |      |            |
| fexA        | fexA-F        | TTGGGAAGAATGGTTCAGGG       | 977  | This study |
|             | fexA-R        | ATCGGCTCAGTAGCATCACG       |      |            |

## References

1. Lim JA, Kwon AR, Kim SK, Chong Y, Lee K, et al. Prevalence of resistance to macrolide, lincosamide and streptogramin antibiotics in Gram-positive cocci isolated in a Korean hospital. *J Antimicrob Chemother.* 2002;49(3):489-95.
2. Patel R, Uhl JR, Kohner P, Hopkins MK, Rd FRC. Multiplex PCR detection of vanA, vanB, vanC-1, and vanC-2/3 genes in *enterococci*. *J Clin Microbiol.* 1997;35(3):703-7.
3. Kehrenberg C, Schwarz S. Distribution of florfenicol resistance genes *fexA* and *cfr* among chloramphenicol-resistant *Staphylococcus* isolates. *Antimicrob Agents Chemother.* 2006;50(4):1156-63.
4. Weigel LM, Donlan RM, Shin DH, Jensen B, Clark NC, et al. High-level vancomycin-resistant *Staphylococcus aureus* isolates associated with a polymicrobial biofilm. *Antimicrob Agents Chemother.* 2007;51(1):231-8.
5. Wang MH, Guo QL, Xu XG, Wang XY, Ye XY, et al. New plasmid-mediated quinolone resistance gene, *qnrC*, found in a

- clinical isolate of *Proteus mirabilis*. *Antimicrob Agents Chemother.* 2009;53(5):1892-7.
6. Kobayashi N, Alam M, Nishimoto Y, Urasawa S, Uehara N, et al. Distribution of aminoglycoside resistance genes in recent clinical isolates of *Enterococcus faecalis*, *Enterococcus faecium* and *Enterococcus avium*. *Epidemiol and Infect.* 2001; 126(2):197-204.
  7. Argudín MA, Mendoza MC, Gonzálezhevia MA, Bances M, Guerra B, et al. Genotypes, Exotoxin Gene Content, and Antimicrobial Resistance of *Staphylococcus aureus* Strains Recovered from Foods and Food Handlers. *Appl Environ Microbiol.* 2012;78(78): 2930-5.
  8. Haroche J, Allignet J, Buchrieser C, El SN. Characterization of a variant of *vga (A)* conferring resistance to streptogramin A and related compounds. *Antimicrob Agents Chemother.* 2000;44(9):2271-5.
  9. Feßler AT, Kadlec K, Hassel M, Hauschild T, Eidam C, et al. Characterization of methicillin-resistant *Staphylococcus aureus* isolates from food and food products of poultry origin in Germany. *Appl Environ Microb.* 2011;77(20):7151-7.
  10. Jung YH, Shin ES, Kim O, Yoo JS, Lee KM, et al. Characterization of two newly identified genes, *vgaD* and *vatG*, conferring resistance to streptogramin A in *Enterococcus faecium*. *Antimicrob Agents Chemother.* 2010;54(11):4744-9.
  11. Lozano C, Aspiroz C, Sáenz Y, Ruizgarcía M, Royogarcía G, et al. Genetic environment and location of the *lnu (A)* and *lnu (B)* genes in methicillin-resistant *Staphylococcus aureus* and other *staphylococci* of animal and human origin. *J Antimicrobl Chemother.* 2012;67(12):2804-8.
  12. Matos R, Pinto VV, Ruivo M, Lopes, MDFS. Study on the dissemination of the *bcrABDR* cluster in *Enterococcus* spp. reveals that the *BcrAB* transporter is sufficient to confer high-level bacitracin resistance. *Int J Antimicrob Agents.* 2009; 34(2):142-7.
  13. Ren C, Zhao Y, Shen Y. Analysis of the effect of integrons on drug-resistant *Staphylococcus aureus* by multiplex PCR detection. *Mol Med Rep.* 2013;7(3):719-24.
  14. De Vries LE, Christensen H, Skov RL, Aarestrup FM, Agersø Y. Diversity of the tetracycline resistance gene *tet (M)* and identification of *Tn916*- and *Tn5801*-like (*Tn6014*) transposons in *Staphylococcus aureus* from humans and animals. *J Antimicrob Chemother.* 2000;64(3):490-500.
