# Supplementary material for: Prevalence, resistance pattern, and molecular characterization of Staphylococcus aureus isolates from healthy animals and sick populations in Henan Province, China
Source: Springer Nature journal article supplement (doi:10.1186/s13099-018-0254-9), 2018-07-17
Supplement: MOESM4 [file 15959636]

**Table S4.** Oligonucleotide Sequences, primers, and targets for Polymerase Chain Reaction Amplification of Virulence genes in *Staphylococcus aureus* Isolates

| Gene  | Primer name | Oligonucleotide sequence(5'→3') | Amplicon size(bp) | Reference |
|-------|-------------|---------------------------------|-------------------|-----------|
| sea   | sea-F       | AAAGATTTGCGAAAAAAGTGTGAATT      | 669               | 1         |
|       | sea-R       | TAAATCGTAATTAACCGAAGGTTCTG      |                   |           |
| seb   | seb-F       | TATGATGATAATCATGTATCAGCAA       | 424               | 1         |
|       | seb-R       | CCAAATAGTGACGAGTTAGGTAA         |                   |           |
| sec   | sec-F       | TATGATGATAATCATGTATCAGCAA       | 315               | 1         |
|       | sec-R       | TAAGTACATTTTGTAAGTTCCCATT       |                   |           |
| sed   | sed-F       | CTAGTTTGGTAATATCTCCTTTAAACG     | 319               | 1         |
|       | sed-R       | TTAATGCTATATCTTATAGGGTAAACATC   |                   |           |
| see   | see-F       | AAAGATTTGCGAAAAAAGTGTGAATT      | 512               | 1         |
|       | see-R       | TTGCACCTTACCGCCAAAGCTG          |                   |           |
| sej   | sej-F       | CTCCCTGACGTTAACTACTAATAA        | 641               | 1         |
|       | sej-R       | TTGTCTGGATATTGACCTATAACATT      |                   |           |
| sem   | sem-F       | ATGCTGTAGATGTATATGGTCTAAG       | 473               | 1         |
|       | sem-R       | CGTCCTTATAAGATATTTCTACATC       |                   |           |
| sen   | sen-F       | ATGAGATTGTTCTACATAGCTGCAAT      | 680               | 2         |
|       | sen-R       | AACTCTGCTCCCACTGAAC             |                   |           |
| sep   | sep-F       | TTAGACAAACCTATTATCATAATGG       | 272               | 1         |
|       | sep-R       | TATTATCATGTAACGTTACACCGCC       |                   |           |
| set   | set-F       | GAAGGTCTACAAGGCCAAAATGTCT       | 363               | 3         |
|       | set-R       | TCAACACATCGCCCATGCGCTCGA        |                   |           |
| hla   | hla-F       | CTGATTACTATCCAAGAAATTCGATTG     | 209               | 2         |
|       | hla-R       | CTTCCAGCCTACTTTTTTATCAGT        |                   |           |
| hlb   | hlb-F       | GTGCACTTACTGACAATAGTGC          | 309               | 2         |
|       | hlb-R       | GTTGATGAGTAGCTACCTTCAGT         |                   |           |
| hld   | hld-F       | AAGAATTTTTATCTTAATTAAGGAAGGAGTG | 111               | 2         |
|       | hld-R       | TTAGTGAATTIGTTCACTGTGTCGA       |                   |           |
| hlg   | hlg-F       | GTCATAGAGTCCATAATGCATTTAA       | 535               | 2         |
|       | hlg-R       | CACCAAATGTATAGCCTAAAGTG         |                   |           |
| lukED | lukED-F     | TGAAAAAGGTTCAAAGTTGATACGAG      | 269               | 2         |
|       | lukED-R     | TGTATTCGATAGCAAAGCAGTGCA        |                   |           |
| pvl   | pvl-F       | ATCATTAGGTAAAATGTCTGGACATGATCCA | 433               | 4         |
|       | pvl-R       | GCATCAAGTGTATTGGATAGCAAAGC      |                   |           |
| cna   | cna-F       | CGGGAGATATGCTACCAGAAGATA        | 278               | 3         |

|      |        |                            |     |   |
|------|--------|----------------------------|-----|---|
|      | cna-R  | ATAGCCTTGTGGAATTGTTACATCA  |     |   |
| ebp  | ebp-F  | AGACCAATCAGAATTAGAACATCA   | 378 | 3 |
|      | ebp-R  | TCAGAAACTGTTGAATGCTCAGTGT  |     |   |
| clfA | clfA-F | AAAACACGCAATTCGGAAAA       | 855 | 5 |
|      | clfA-R | GCAGTTGAAGTTACACCATTTAAGT  |     |   |
| clfB | clfB-F | TGTCGAATAAGCAGAATAAG       | 505 | 5 |
|      | clfB-R | GGTGATGATTGTGGTAAATC       |     |   |
| tsst | tsst-F | AGCATCTACAAACGATAATATAAAGG | 481 | 1 |
|      | tsst-R | CATTGTTATTTTCCAATAACCACCCG |     |   |
| eta  | eta-F  | CTATTTACTGTAGGAGCTAG       | 741 | 1 |
|      | eta-R  | ATTTATTTGATGCTCTCTAT       |     |   |
| etb  | etb-F  | ATACACACATTACGGATAAT       | 629 | 1 |
|      | etb-R  | CAAAGTGTCTCCAAAAGTAT       |     |   |
| etd  | etd-F  | AACTATCATGTATCAAGG         | 376 | 1 |
|      | etd-R  | CAGAATTTCCCGACTCAG         |     |   |

## References

1. Argudín MA, Mendoza MC, Gonzálezhevia MA, Bances M, Guerra B, et al. Genotypes, Exotoxin Gene Content, and Antimicrobial Resistance of *Staphylococcus aureus* Strains Recovered from Foods and Food Handlers. *Appl Environ Microbiol.* 2012;78(78): 2930-5.
2. Jarraud S, Mougél C, Thioulouse J, Lina G, Meugnier H, et al. Relationships between *Staphylococcus aureus* genetic background, virulence factors, *agr* groups (alleles), and human disease. *Infect Immun.* 2002;70(2):631-41.
3. Babamoussa L, Sina H, Scheftel JM, Moreau B, Saintemarie D, et al. *Staphylococcal* Pantón-Valentine leucocidin as a major virulence factor associated to furuncles. *PLoS One.* 2011;6(10):e25716.
4. Lina G, Piémont Y, Godail-Gamot F, Bes M, Peter MO, et al. Involvement of Pantón-Valentine leukocidin-producing *Staphylococcus aureus* in primary skin infections and pneumonia. *Clin Infect Dis.* 1999;29(5):1128-32.
5. Ote I, Taminiá B, Duprez JN, Dizier I, Mainil JG. Genotypic characterization by polymerase chain reaction of *Staphylococcus aureus* isolates associated with bovine mastitis. *Vet Microbiol.* 2011;153(3-4):285-292.
